# Supplementary material for: Phosphorus supply and floodplain design govern phosphorus reduction capacity in remediated agricultural streams
Source: Copernicus journal article supplement (doi:10.5194/hess-28-341-2024), 2024-01-26
Supplement: Supplementary file 2 [file hess-28-341-2024-supplement.zip]

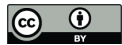

## *Supplement of*

# **Phosphorus supply and floodplain design govern phosphorus reduction capacity in remediated agricultural streams**

**Lukas Hallberg et al.**

*Correspondence to:* Lukas Hallberg ([lukas.hallberg@slu.se](mailto:lukas.hallberg@slu.se))

- [hess-28-341-2024-supplement-title-page.pdf](#)
- Supplement
  - Deposited sediment chemistry.csv
  - Hydrology
    - \* C1.csv
    - \* C2.csv
    - \* C3.csv
    - \* C4.csv
    - \* C5.csv
    - \* S10.csv
    - \* S6.csv
    - \* S7.csv
    - \* S8.csv
    - \* S9.csv
  - P fractions in sediments.csv
  - Supplement.pdf
  - Water quality.csv

The copyright of individual parts of the supplement might differ from the article licence.
